# Supplementary material for: Data in support of sustained upregulation of adaptive redox homeostasis mechanisms caused by KRIT1 loss-of-function
Source: PubMed Central journal article supplement — Data Brief. 2017 Dec 13;16:929–38. doi: 10.1016/j.dib.2017.12.026 (PMC5832564; doi:10.1016/j.dib.2017.12.026), 2017-12-13
Supplement: mmc1.pdf [file mmc1.pdf]

**CONFLICT OF INTEREST AND AUTHORSHIP CONFIRMATION**  
**PLEASE CHECK THE FOLLOWING AS APPROPRIATE.**

- All authors have participated in (a) conception and design, or analysis and interpretation of the data; (b) drafting the article or revising it critically for important intellectual content; and (c) approval of the final version.
- The Article I have submitted to the journal for review is original, has been written by the stated authors and has not been published elsewhere.
- The Images that I have submitted to the journal for review are original, was taken by the stated authors, and has not been published elsewhere.
- This manuscript has not been submitted to, nor is under review at, another journal or other publishing venue.
- The authors have no affiliation with any organization with a direct or indirect financial interest in the subject matter discussed in the manuscript.

Declarations of interest: none

Yours sincerely,  
Saverio Francesco Retta

---

Professor of Cell Biology  
Department of Clinical and Biological Sciences  
School of Medicine and Surgery  
University of Torino  
Regione Gonzole, 10  
10043 Orbassano (Torino), Italy  
Phone: +39-011.6706426  
e-mail: francesco.retta@unito.it
